# Supplementary material for: Social Distancing Compliance under COVID-19 Pandemic and Mental Health Impacts: A Population-Based Study
Source: Int J Environ Res Public Health. 2020 Sep 14;17(18):6692. doi: 10.3390/ijerph17186692 (PMC7560229; doi:10.3390/ijerph17186692)
Supplement: Supplementary file 1 [file ijerph-17-06692-s001.pdf]

**Table S1.** Association of mental health symptoms with personal protection measures.

|                                          | Prevalence     | Stress                                | Anxiety                          | Depression                       |
|------------------------------------------|----------------|---------------------------------------|----------------------------------|----------------------------------|
| Personal protection measures             | Weighted n (%) | Adjusted $\beta$ (95%CI) <sup>a</sup> | Adjusted OR (95%CI) <sup>a</sup> | Adjusted OR (95%CI) <sup>a</sup> |
| Wear a surgical mask when going out      | 1398 (93.1)    | -1.85 (-2.26, -1.44) ***              | 0.28 (0.17, 0.45) ***            | 0.30 (0.18, 0.49) ***            |
| Wash hands with alcohol-based sanitizers | 1328 (88.5)    | -0.57 (-0.89, -0.24) ***              | 0.84 (0.54, 1.31)                | 0.61 (0.40, 1.05)                |
| Use alcohol to clean daily necessities   | 1186 (79.0)    | -0.49 (-0.75, -0.23) ***              | 0.61 (0.44, 0.86) **             | 0.47 (0.34, 0.66) ***            |
| Add water to household drainage system   | 1144 (76.2)    | -0.49 (-0.73, -0.24) ***              | 0.55 (0.40, 0.75) ***            | 0.46 (0.33, 0.63) ***            |

Note: CI, confidence interval; OR, odds ratio; \*  $p < 0.05$ , \*\*  $p < 0.01$ , \*\*\*  $p < 0.001$  <sup>a</sup> Adjusted for sociodemographic factors and total number of social distancing measures (range: 0–6).

**Table S2.** Interaction of mental health symptoms by age and education.

| Effect Modification of Age and Education             | Adjusted $\beta$ /OR (95% CI) <sup>a</sup> |                          | $p$ for Interaction | Adjusted $\beta$ /OR (95% CI) <sup>b</sup> |                          |                          | $p$ for Interaction |
|------------------------------------------------------|--------------------------------------------|--------------------------|---------------------|--------------------------------------------|--------------------------|--------------------------|---------------------|
|                                                      | Age Groups                                 |                          |                     | Education Attainment                       |                          |                          |                     |
|                                                      | 18–59 years                                | 60+ years                |                     | Primary or below                           | Secondary                | Tertiary                 |                     |
| Stress level ( $\beta$ )                             |                                            |                          |                     |                                            |                          |                          |                     |
| Stay at home in past 7 days                          | 0.00 (−0.08, 0.08)                         | 0.04 (−0.04, 0.11)       | 0.55                | 0.11 (0.01, 0.22) *                        | 0.02 (−0.05, 0.10)       | −0.02 (−0.15, 0.10)      | 0.014               |
| Perceived compliance with social distancing measures | −0.29 (−0.37, −0.22) ***                   | −0.27 (−0.34, −0.19) *** | 0.34                | −0.24 (−0.34, −0.14) ***                   | −0.30 (−0.37, −0.23) *** | −0.26 (−0.37, −0.14) *** | 0.90                |
| Anxiety (OR)                                         |                                            |                          |                     |                                            |                          |                          |                     |
| Stay at home in past 7 days                          | 0.98 (0.89, 1.09)                          | 1.17 (1.05, 1.31) **     | 0.005               | 1.34 (1.07, 1.66) **                       | 1.03 (0.93, 1.13)        | 1.01 (0.88, 1.17)        | 0.17                |
| Perceived compliance with social distancing measures | 0.79 (0.71, 0.87) ***                      | 0.80 (0.72, 0.90) ***    | 0.42                | 0.81 (0.67, 0.98) *                        | 0.78 (0.71, 0.87) ***    | 0.80 (0.69, 0.93) **     | 0.72                |
| Depression (OR)                                      |                                            |                          |                     |                                            |                          |                          |                     |
| Stay at home in past 7 days                          | 1.03 (0.93, 1.13)                          | 1.22 (1.08, 1.37) ***    | 0.008               | 1.46 (1.16, 1.85) ***                      | 1.07 (0.97, 1.19)        | 1.00 (0.86, 1.16)        | 0.16                |
| Perceived compliance with social distancing measures | 0.77 (0.70, 0.86) ***                      | 0.83 (0.74, 0.93) **     | 0.23                | 0.83 (0.68, 1.01)                          | 0.78 (0.71, 0.86) ***    | 0.78 (0.68, 0.91) **     | 0.89                |

Note: CI, confidence interval; OR, odds ratio.; \*  $p < 0.05$ , \*\*  $p < 0.01$ , \*\*\*  $p < 0.001$ ; <sup>a</sup> Adjusting for sex, educational attainment and marital status; <sup>b</sup> Adjusting for sex, age and marital status.
